# Supplementary material
Source: ML conference proceedings conference paper supplement (https://openreview.net/forum?id=RTlMbI4OSg)
Supplement: supplementary_material [file attachment]

# Supplementary Materials: Exploring the Use of Abusive Generative AI Models on Civitai

Anonymous Authors

## 1 INTRODUCTION

This is a document instructing the supplementary materials we submitted for the submission “Exploring the Use of Abusive Generative AI Models on Civitai”.

## 2 CONTENT AND USAGE OF FILES

This section will summarize the content and usage of each supplied files.

- **metadata\_type\_summarization.xlsx**: a table summarizing the types of metadata collected for models/images/creators.
- **GPT\_response\_tag\_theme\_image.pkl**: records of GPT’s responses for extracting potential thematic categories within image’s tags.
- **GPT\_response\_tag\_theme\_model.pkl**: records of GPT’s responses for extracting potential thematic categories within model’s tags.

- **GPT\_response\_annotate\_tag\_theme\_image.pkl**: records of GPT’s responses for annotating image tags’ themes, based on above extracted thematic categories.
- **GPT\_response\_annotate\_tag\_theme\_model.pkl**: records of GPT’s responses for annotating model tags’ themes, based on above extracted thematic categories.
- **theme\_aggregation\_image.csv**: records of how the authors aggregates duplicated images’ thematic categories into six themes.
- **theme\_aggregation\_model.csv**: records of how the authors aggregates duplicated models’ thematic categories into six themes.
- **tag\_image\_checked.csv**: image tags’ annotation for their themes after a manual check by the authors.
- **tag\_model\_checked.csv**: model tags’ annotation for their themes after a manual check by the authors.
