# Supplementary material
Source: ML conference proceedings conference paper supplement (https://openreview.net/forum?id=RTlMbI4OSg)
Supplement: supplementary_material [file attachment]

## Sheet: Sheet1
	Model	Image	Creator
Number of downloads	ü
Number of views		ü*
Number of favorites/likes	ü
Number of comments	ü	ü
Number of reactions		ü
Rating score	ü	ü*
Amount of tips	ü*	ü*
Tags	ü	ü*
Textual description	ü
Flags as NSFW	ü	ü
Flag as deepfake	ü
Prompt		ü
Used models		ü
Follower/Followee list			ü*
Note: The ü denotes that the corresponding metadata is collected through Civitai REST API. The ü* denotes that the corresponding metadata is collected by Selenium WebDriver.
